# Supplementary material
Source: publisher figshare collection journal article supplement (https://diabetesjournals.figshare.com/articles/dataset/_/25668735)
Supplement: Supplementary file 1 [file 45794916]

## Supplemental information

**Supple. Fig. 1.** Characterization of AMPK $\gamma$ 2 KO mice.

**Supple. Fig. 2.** Expression of AMPK $\gamma$ 2 protein and mRNA in the kidney of AMPK $\gamma$ 2KO mice.

**Supple. Fig. 3.** Expression of AMPK $\gamma$ 2 in major organs.

**Supple. Fig. 4.** Plasma TSH level in the experimental animals. .

**Supple. Fig. 5.** Expression of AMPK subunits in the kidney of AMPK $\gamma$ 2KO mice.

**Supple. Fig. 6.** Diagram of timeline of the experiment. Plasma cholesterol and insulin level in non-diabetic and diabetic mice.

**Supple. Fig. 7.** Body weight, blood glucose level and insulin sensitivity in non-diabetic and diabetic mice.

**Supple. Fig. 8.** Plasma cholesterol and insulin in non-diabetic and diabetic mice.

**Supple. Fig. 9.** Urinary H<sub>2</sub>O<sub>2</sub> in non-diabetic and diabetic mice.

**Supple. Fig. 10.** Plasma BUN in non-diabetic and diabetic mice.

**Supple. Fig. 11. A, B.** Systolic blood pressure.

**Supple. Fig. 12.** Kidney hypertrophy and kidney matrix protein accumulation in non-diabetic and diabetic mice.

**Supple. Fig. 13. A, B.** Kidney fibronectin expression.

**Supple. Fig. 14.** Effect of 17 $\beta$ -estradiol on AMPK phosphorylation in time- and dose-dependent *in vitro*.

**Supple. Fig. 15.** Estradiol ameliorates HG-induced mTORC1 activation and matrix protein accumulation in MCT cells.

**Supple. Fig. 16.** Effect of palmitate on mTORC1-matrix accumulation in MCT cells.

**Supple. Fig. 17.** Pathways which are increased in diabetic WT male and KAMPK $\gamma$ 2KO female mice by ingenuity pathway analysis.

**Supple. Fig. 18.** 4-hydroxyphenylpyruvate dioxygenase (HFD) is decreased in diabetic WT male and KAMPK $\gamma$ 2KO female mice.

**Supple. Table 1.** Plasma 17 $\beta$ -estradiol levels in male and female mice.

**Supple. Table 2.** Visualization of DEGs from group comparisons.

**Supple. Table 3.** Urine metabolites analysis

# Suppl. Fig. 1

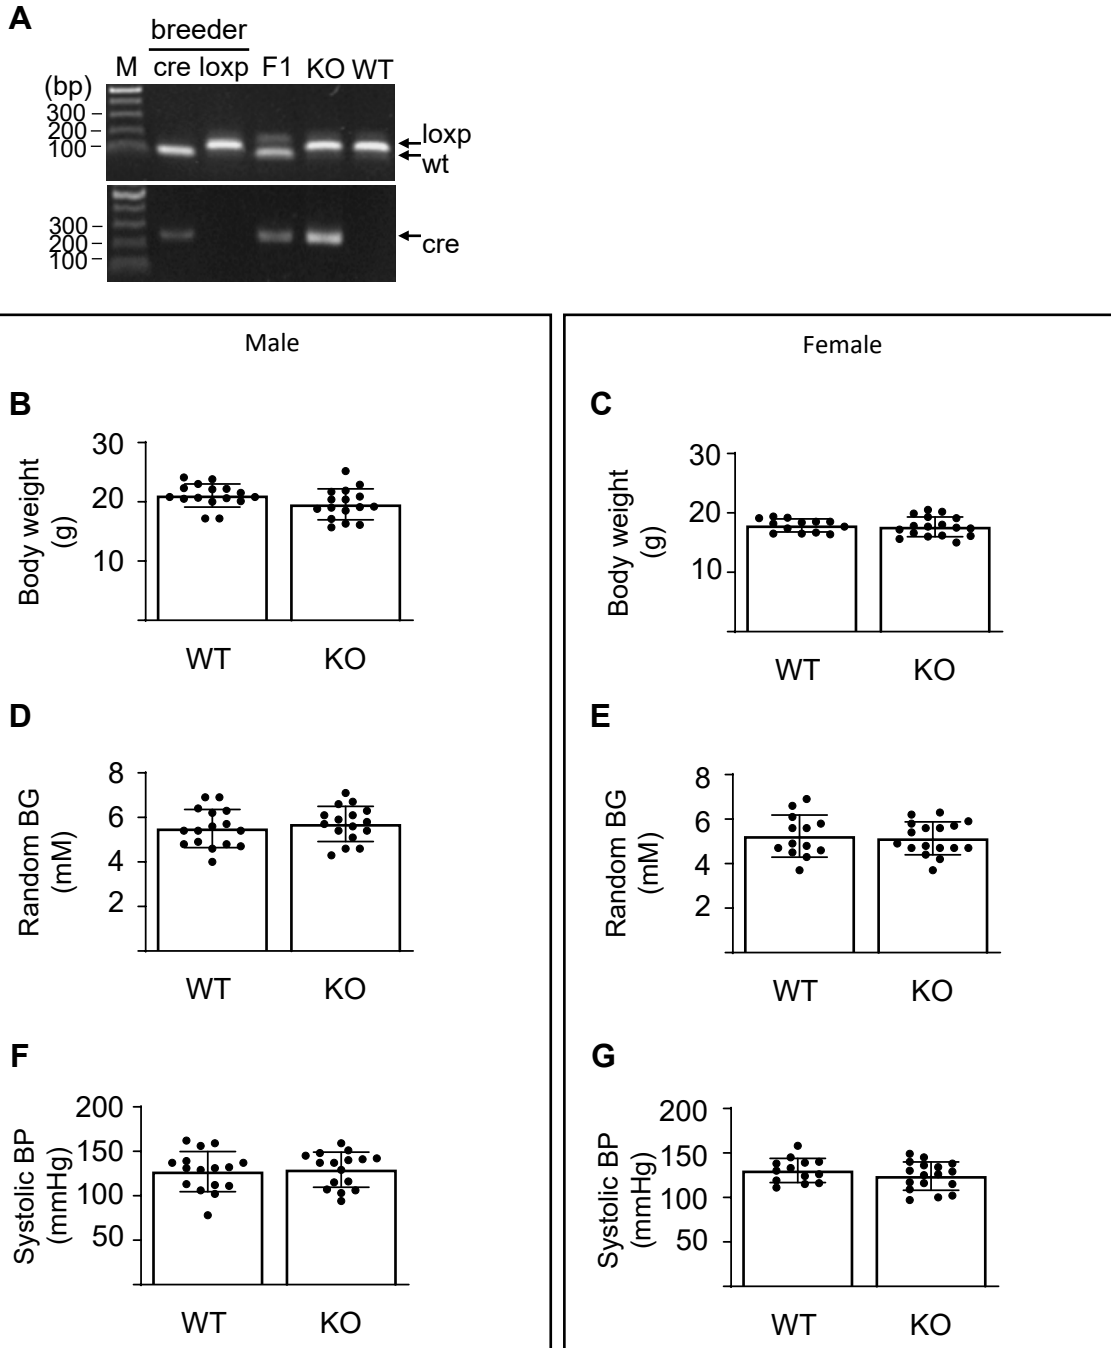

**Supple. Fig. 1.** Generation of  $KTAMPK\gamma 2KO$  mice. **A.** Representative genotyping data. M: Standard marker, cre: pax8-cre, loxp:  $AMPK\gamma 2$ -loxp, F1: F1 generation, WT: wild type, KO:  $AMPK\gamma 2KO$ . **B-E.** Body weight, random blood glucose level and systolic blood pressure were similar between WT and  $AMPK\gamma 2KO$  male and female mice ( $n = 13-16$  per group).

## Suppl. Fig. 2

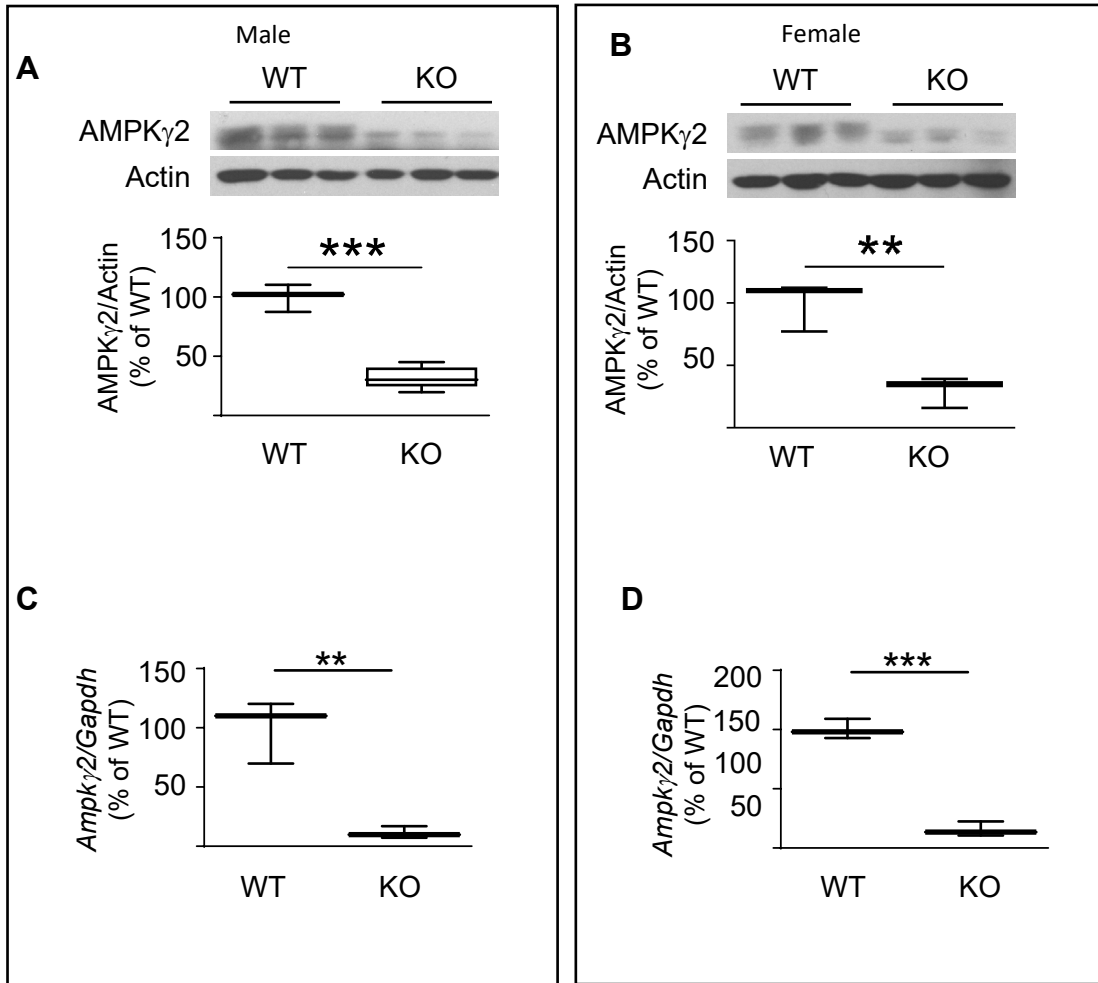

**Supple. Fig. 2. A, B.** AMPK $\gamma$ 2 expression in the kidney. **C, D.** AMPK $\gamma$ 2 mRNA expression in the kidney. \*\* $p < 0.01$ , \*\*\*  $p < 0.001$  by two-tailed t-test.

### Suppl. Fig. 3

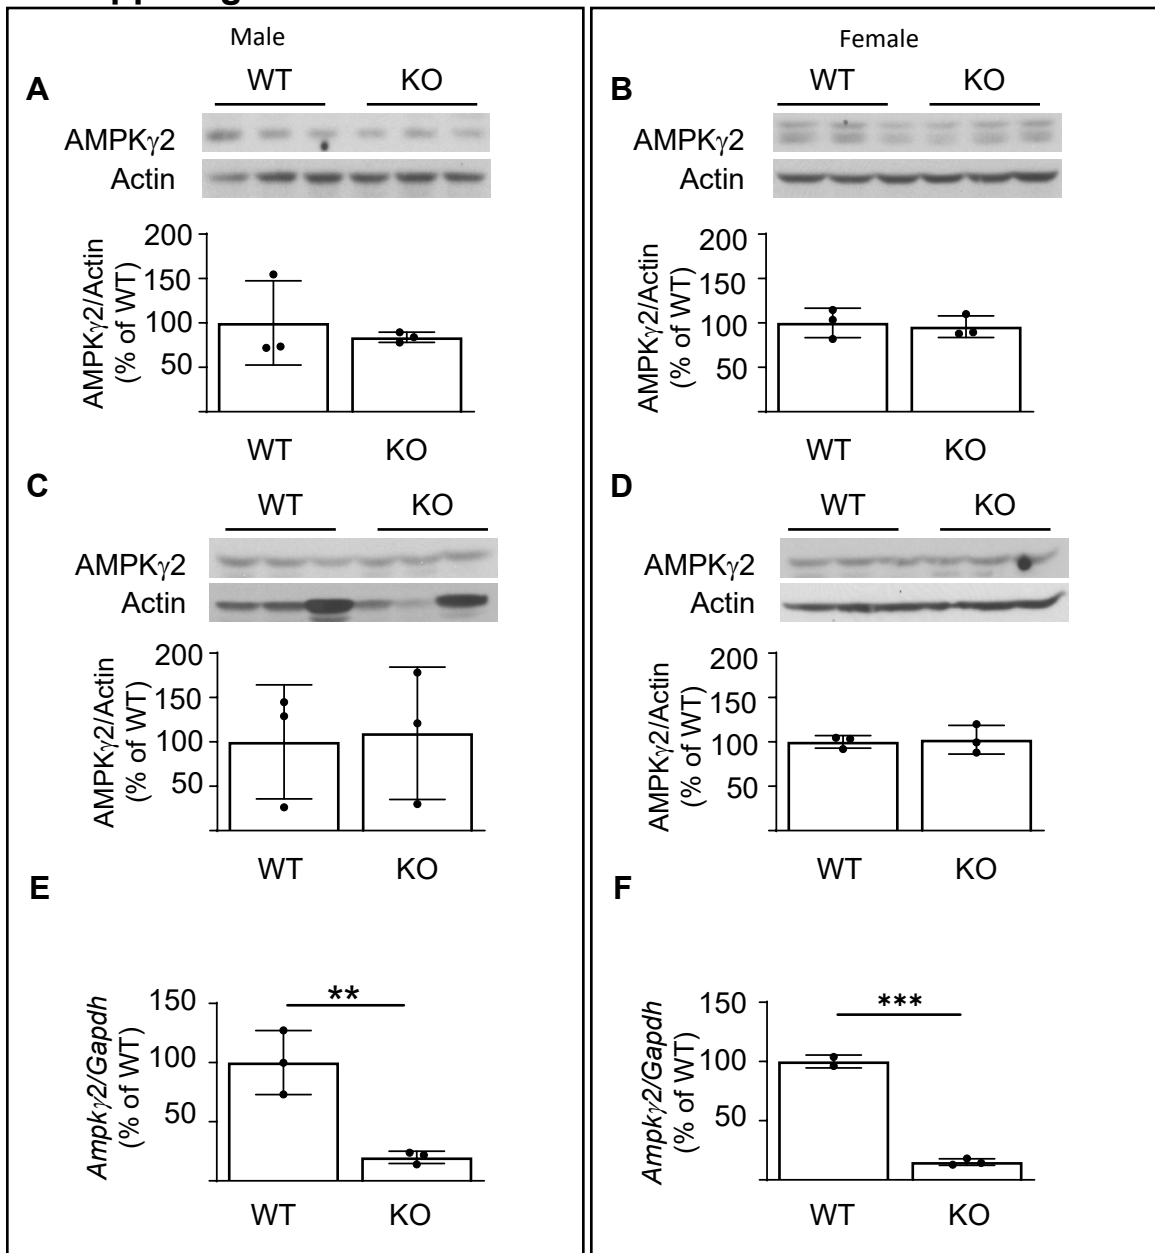

**Supple. Fig. 3. A, B.** AMPK $\gamma$ 2 expression in the liver. **C, D.** AMPK $\gamma$ 2 expression in the muscle. **E, F.** mRNA expression of AMPK $\gamma$ 2 in the thyroid.

\*\*p < 0.01, \*\*\* p < 0.001 by two-tailed t-test.

# Suppl. Fig. 4

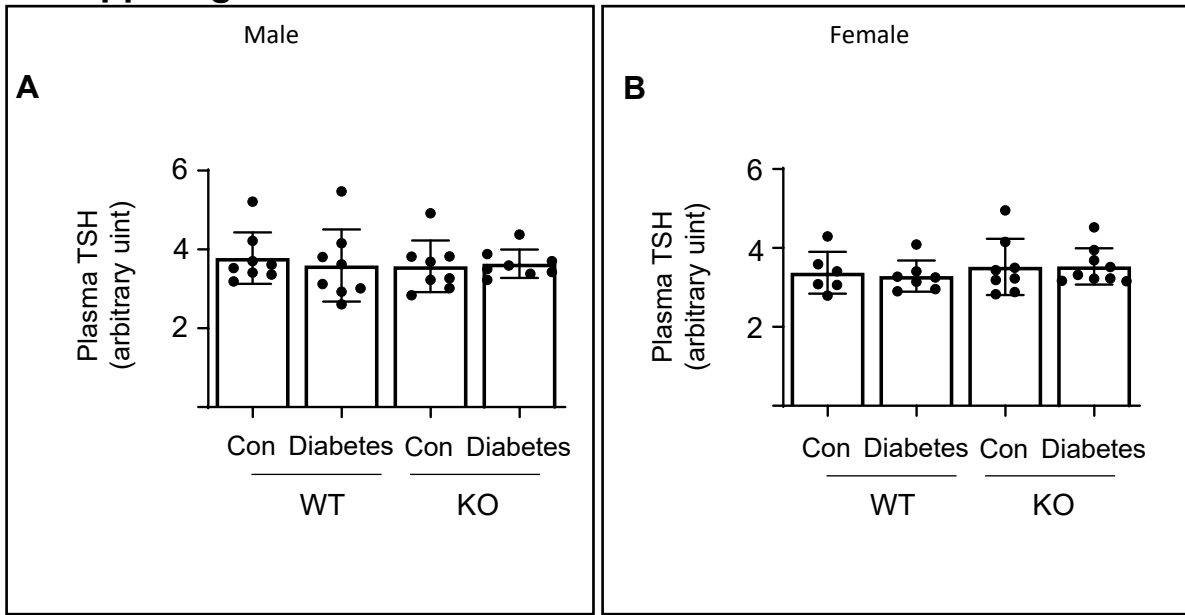

**Supple. Fig. 4. A, B.** Plasma TSH level in the experimental animals. TSH ELISA kit (catalog MBS9716662, MyBioSource) were used to measure the plasma TSH.

# Suppl. Fig. 5

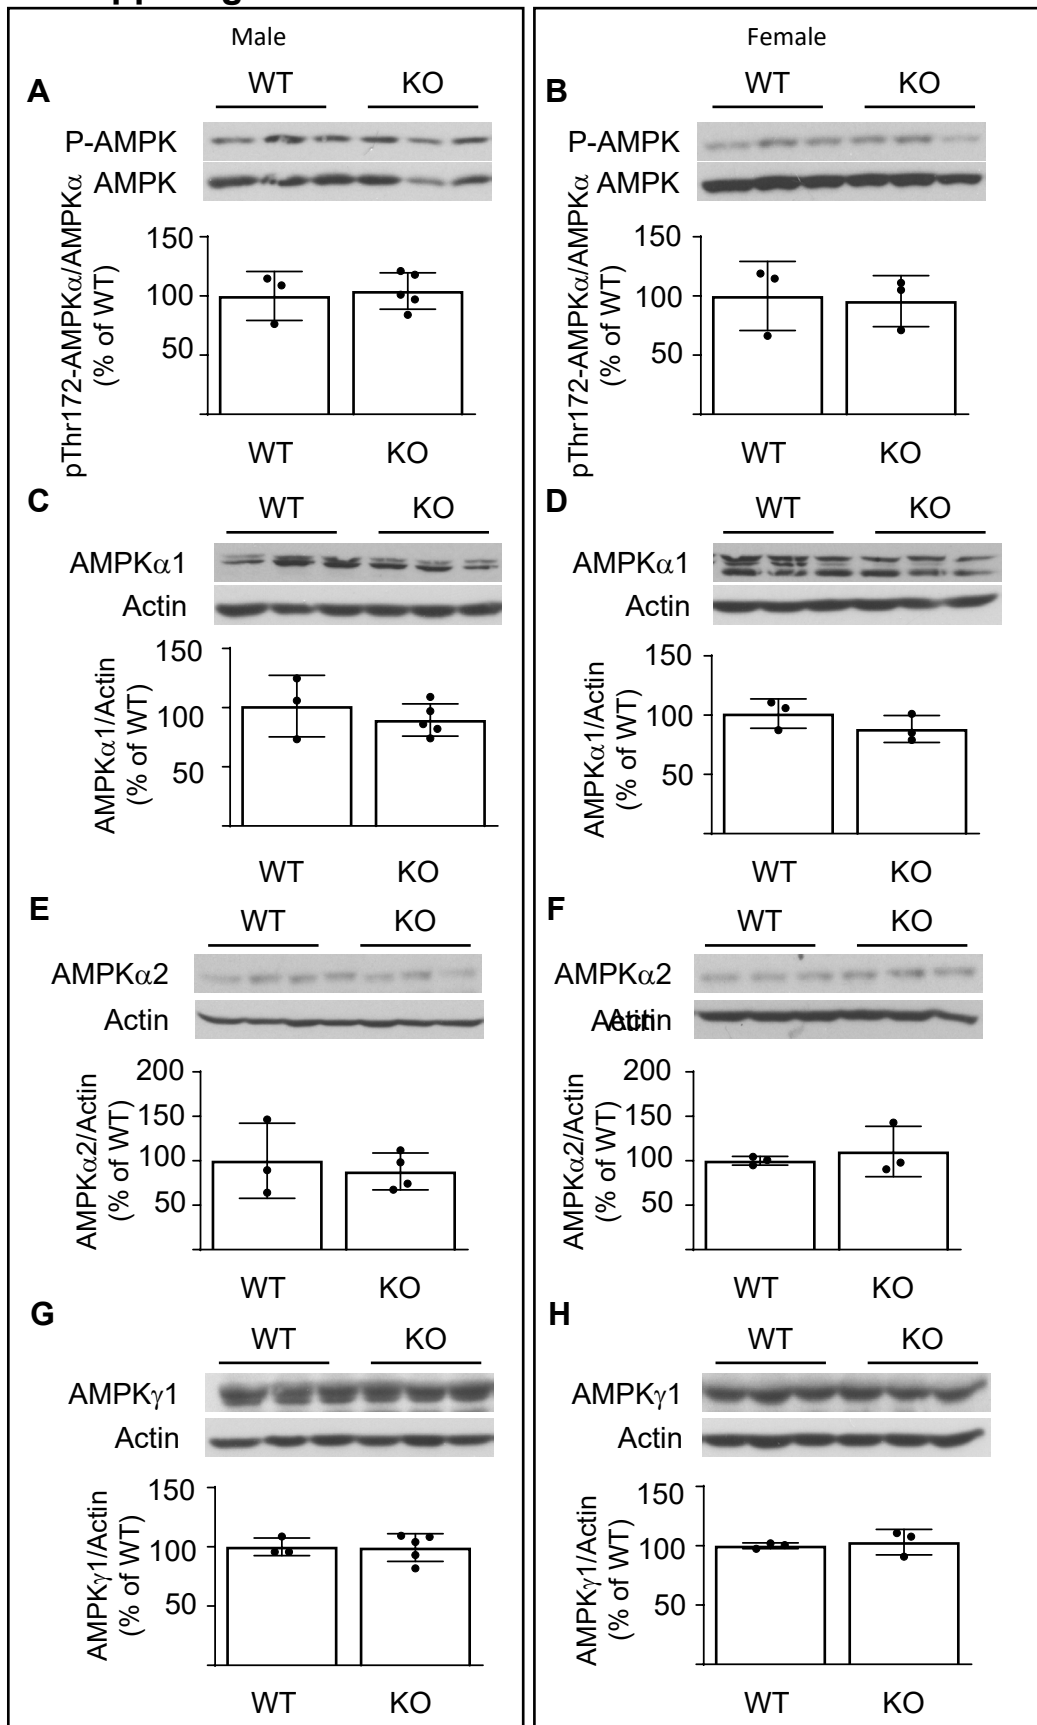

**Supple. Fig. 5. A, B.** AMPK phosphorylation in the kidney. **C-H.** Expression of AMPK  $\alpha$ 1,  $\alpha$ 2 and  $\gamma$ 1 in the kidney.

## Suppl. Fig. 6

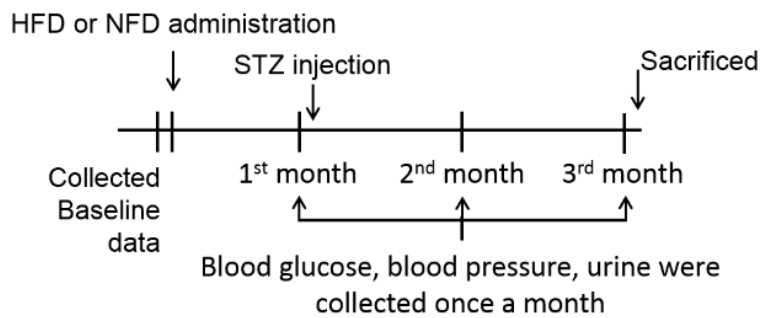

**Supple. Fig. 6.** Diagram of establishment of diabetes in WT and KTAMPK $\gamma$ 2KO mice.

# Suppl. Fig. 7

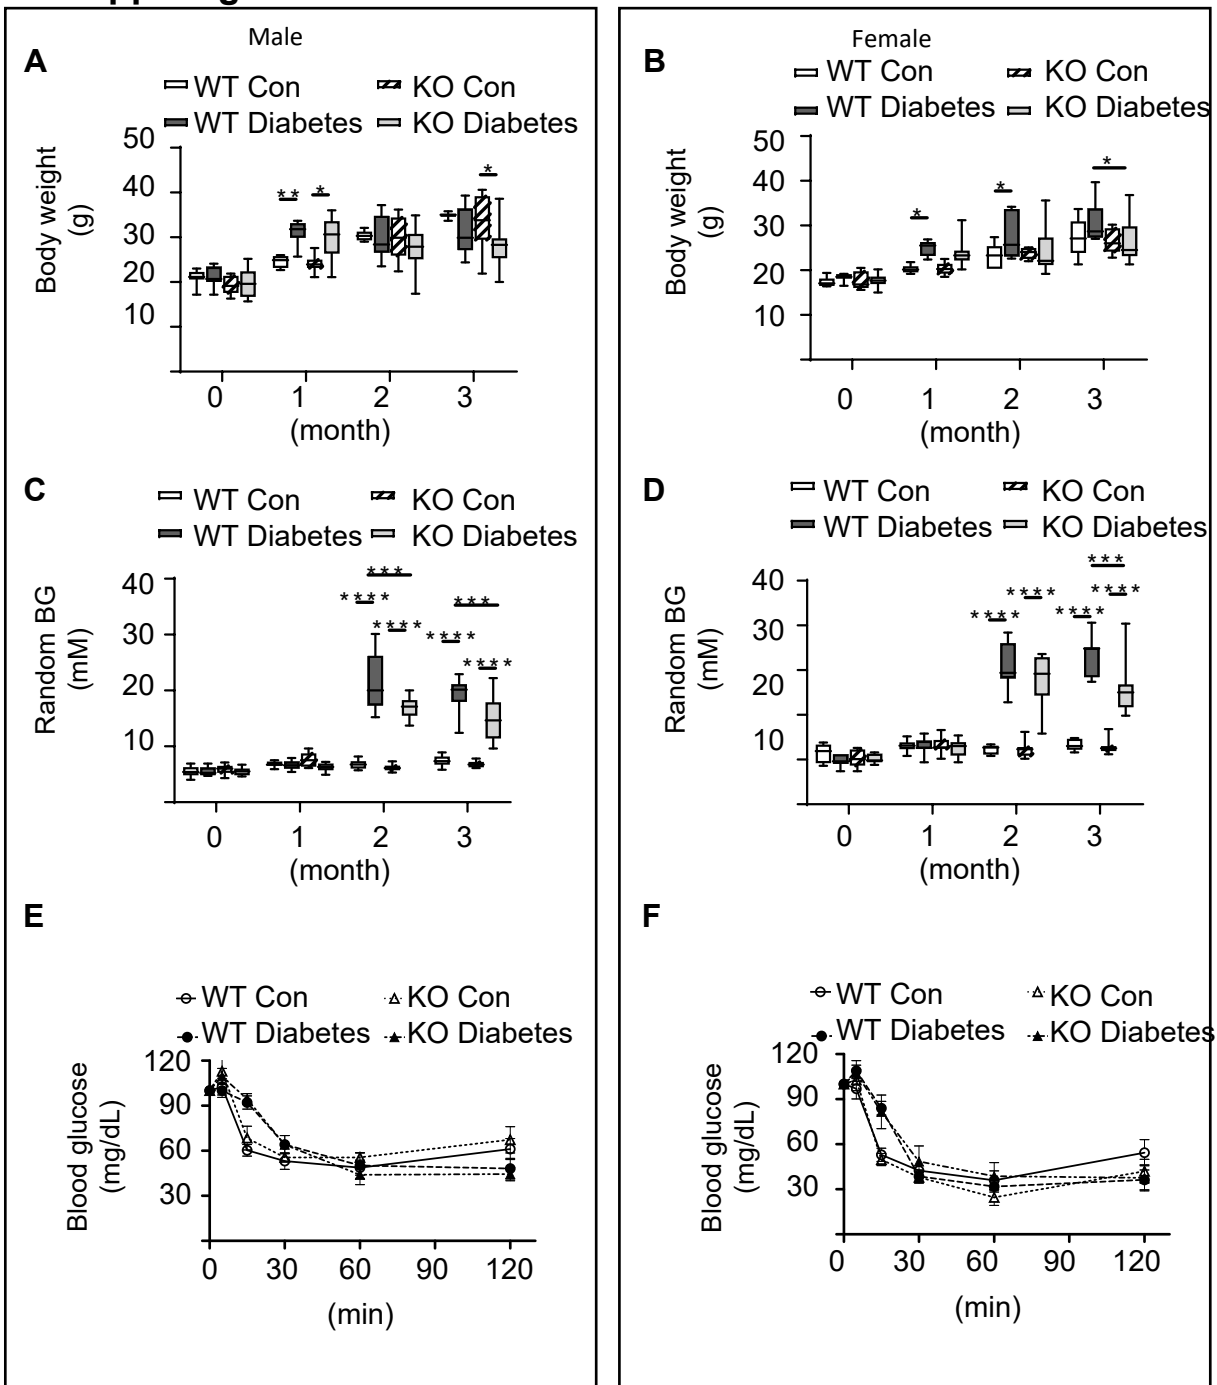

**Supple. Fig. 7. A, B.** Body weight. **C, D.** Random blood glucose level. **E, F.** Insulin tolerance test. \* $p < 0.05$ , \*\* $p < 0.01$ , \*\*\* $p < 0.001$ , \*\*\*\* $p < 0.0001$  by two-way ANOVA.



## Suppl. Fig. 8

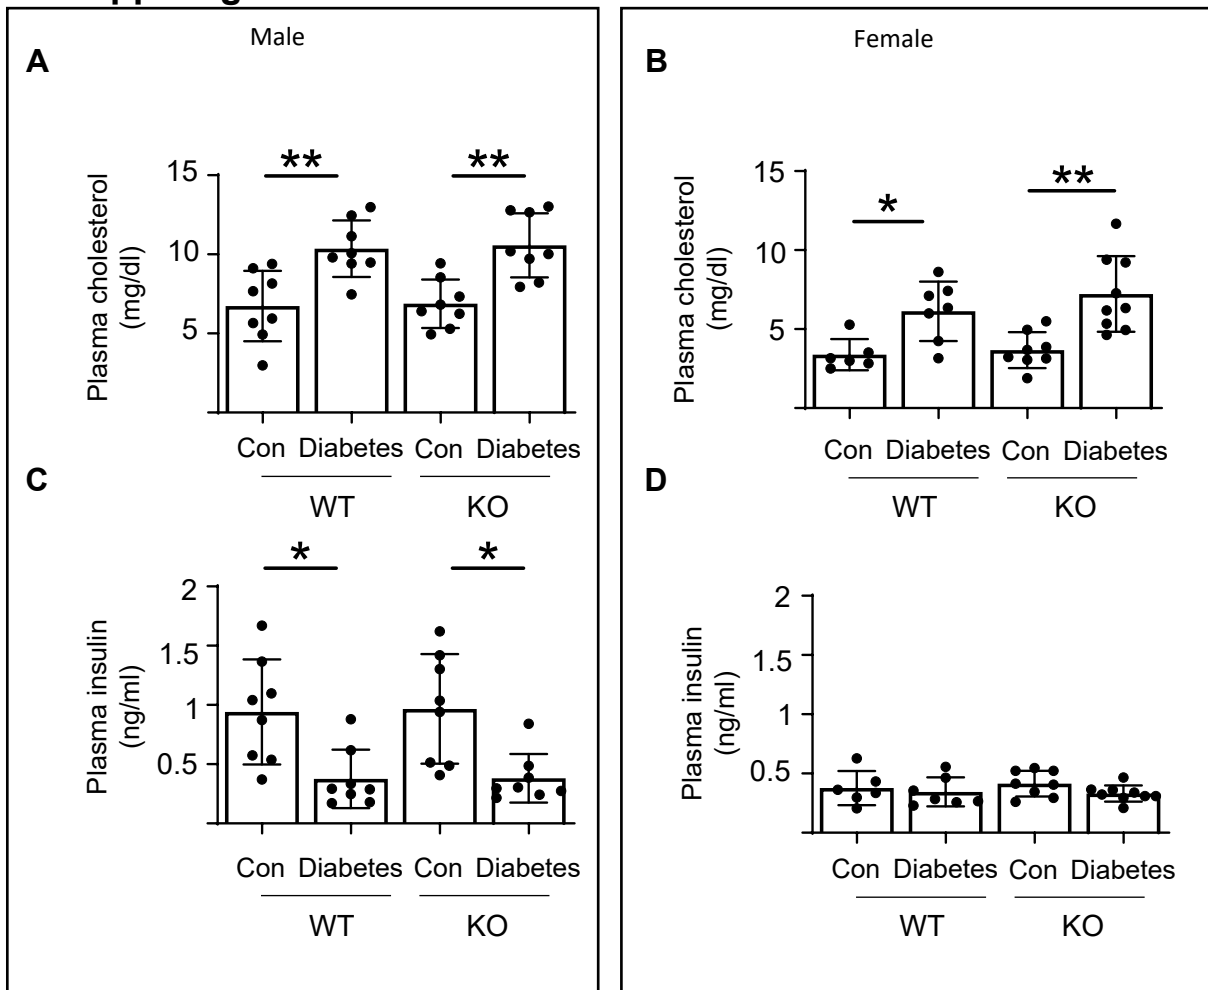

**Supple. Fig. 8. A, B.** Plasma cholesterol level. **C, D.** Plasma fasting insulin level.

\*p<0.05, \*\*p<0.01 by one-way ANOVA.

Cholesterol fluorometric assay kit (catalog 1007640, Cayman) and mouse Insulin ELISA Kit (catalog 90080, Crystal Chem) were used to measure the plasma cholesterol levels and insulin levels (6 h fasting), respectively.

## Suppl. Fig. 9

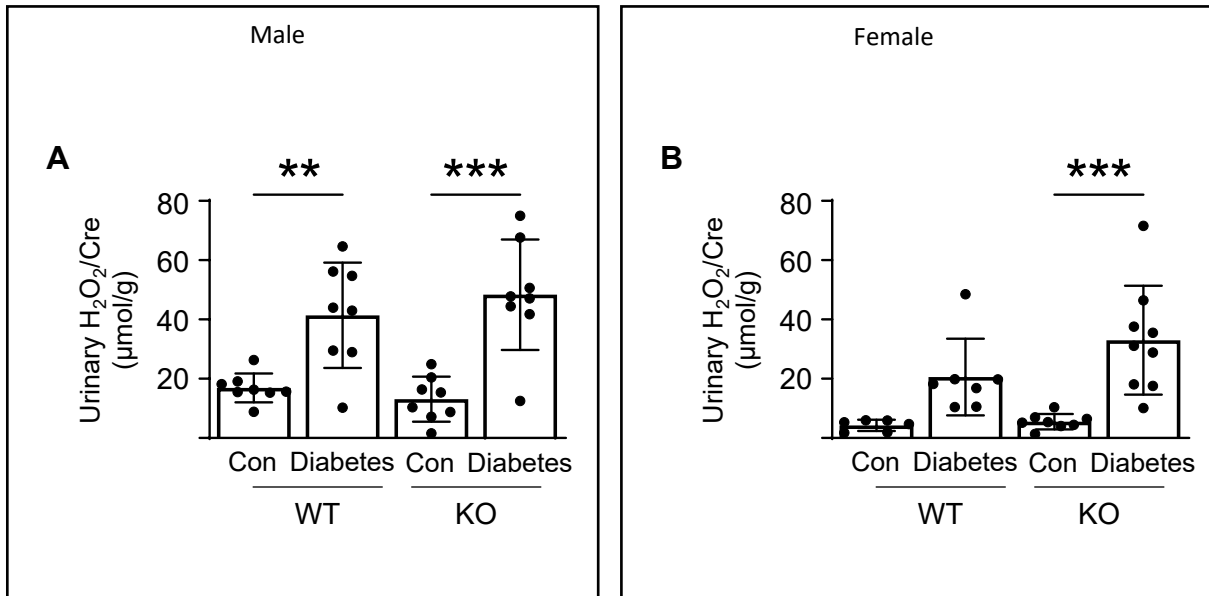

**Supple. Fig. 9. A, B.** Urinary  $H_2O_2$ . \*\* $p < 0.01$ , \*\*\* $p < 0.001$  by one-way ANOVA. Amplex Red  $H_2O_2$  Assay Kit (catalog A22188, Invitrogen) was used to measure urinary  $H_2O_2$ .

# Suppl. Fig. 10

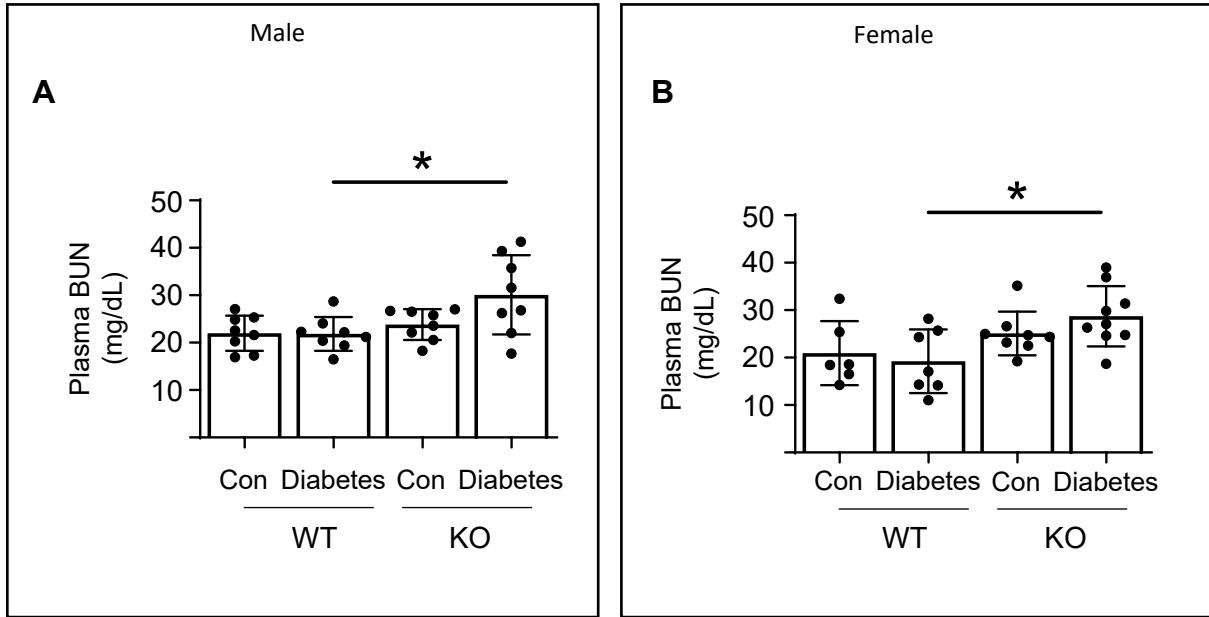

**Supple. Fig. 10. A, B.** Plasma BUN. \* $p < 0.05$  by two-way ANOVA. Plasma BUN was measured by BUN colorimetric detection kit (catalog number K024-H1, Arbor Assays)

# Suppl. Fig. 11

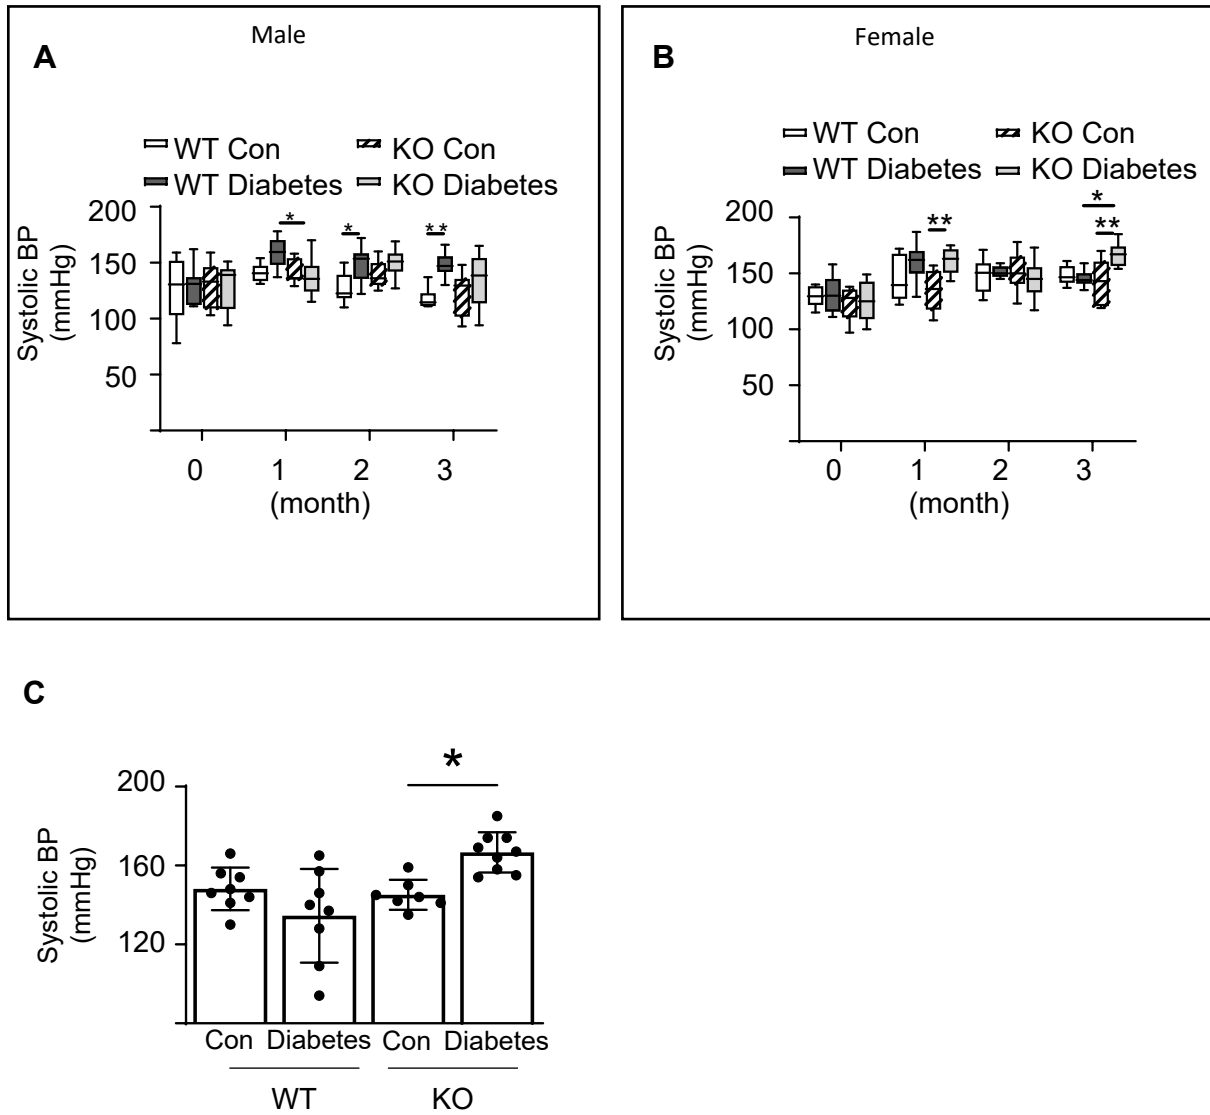

**Supple. Fig. 11. A, B.** Systolic blood pressure. \* $p < 0.05$ , \*\* $p < 0.01$  by two-way ANOVA (A, B) and one-way ANOVA (C).

**Suppl. Fig. 12**

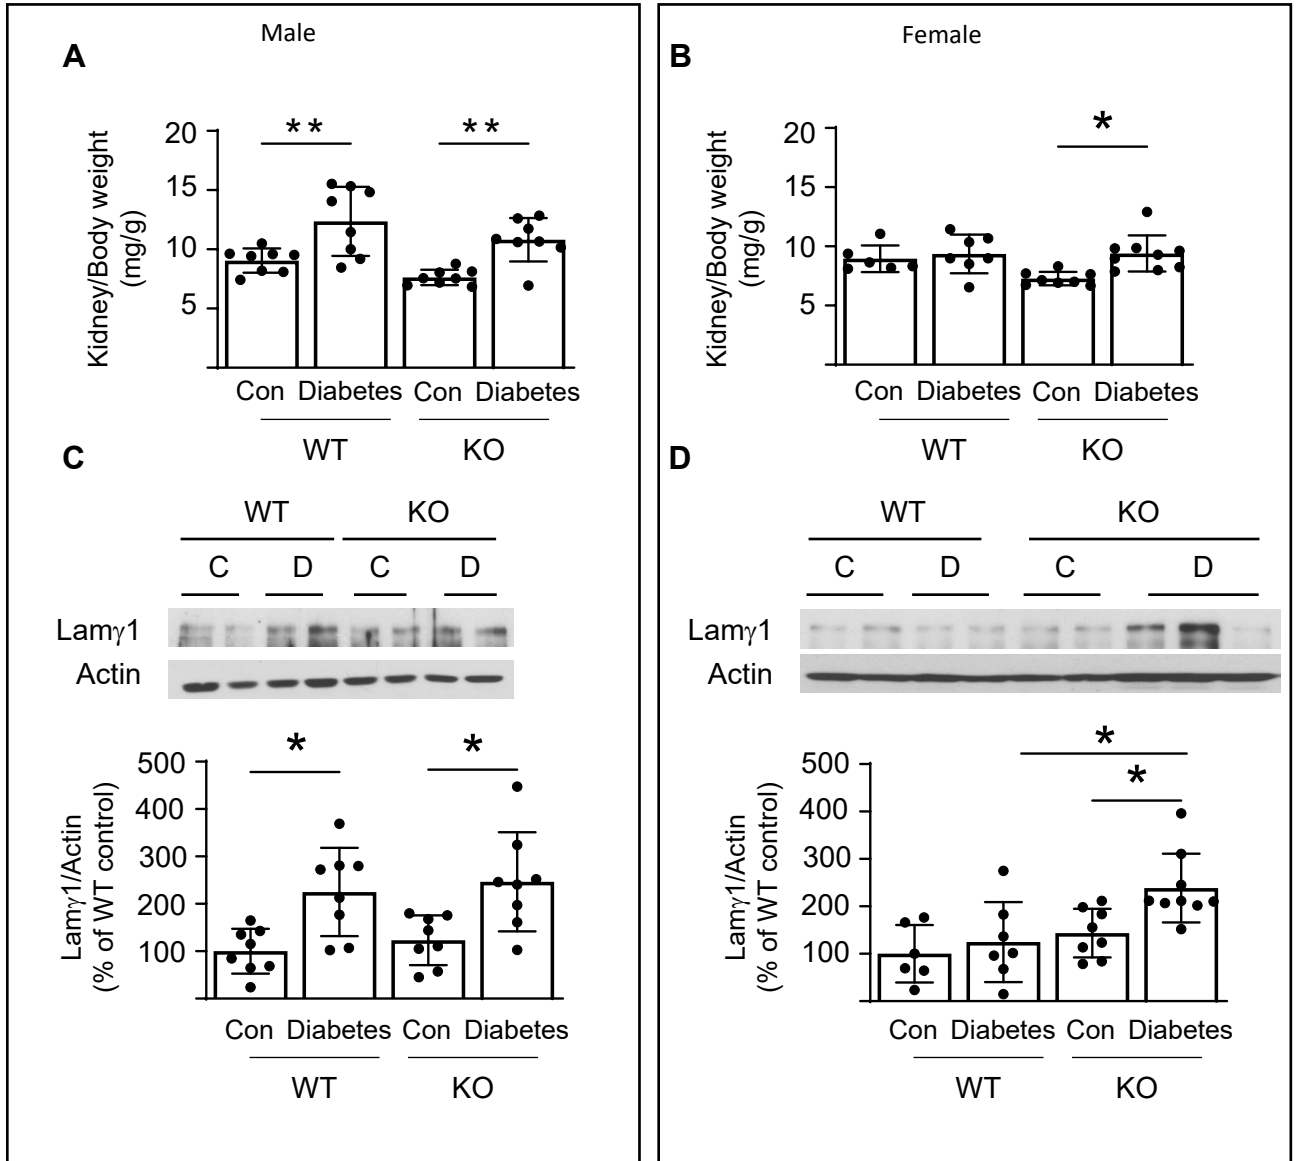

**Supple. Fig. 12. A, B.** kidney to body weight ratio. **C, D.** Laminin gamma1 expression in the kidney. \* $p < 0.05$ , \*\* $p < 0.01$  by one-way ANOVA.

## Suppl. Fig. 13

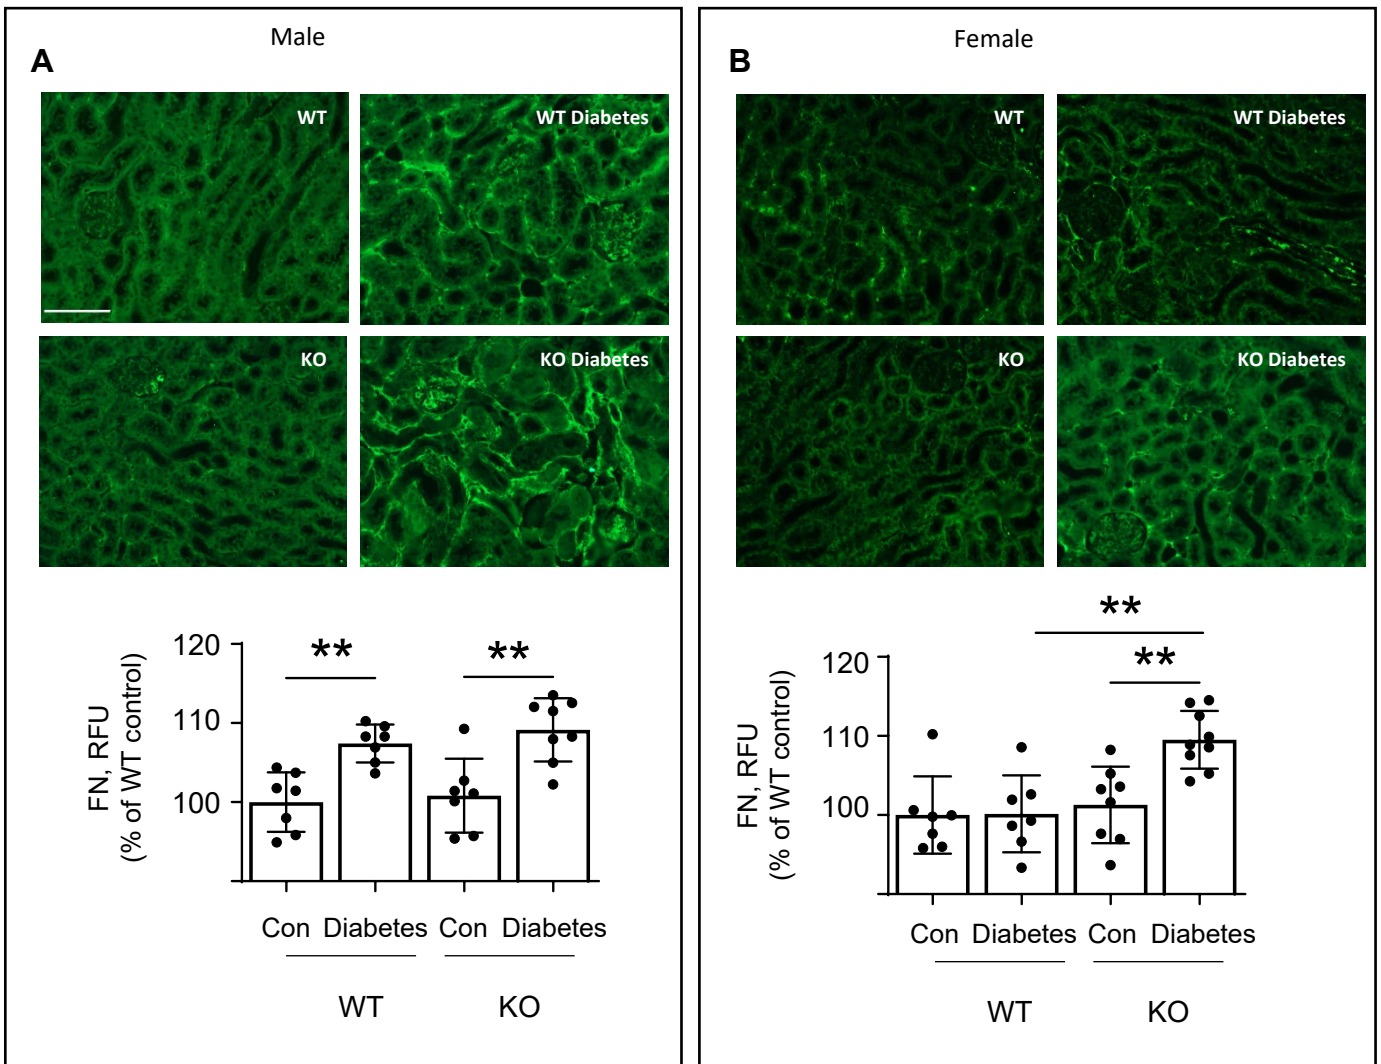

**Supple. Fig. 13. A, B.** Kidney fibronectin expression. \*\* $p < 0.01$  by one-way ANOVA. Immunofluorescence was performed as described below. The kidney sections were deparaffinized in xylene, hydrated in decreasing concentrations of ethanol, and washed with Tris-buffered solution (TBS). To unmask antigens, slides were heated in antigen retrieval solution (catalog H3300, Vectors lab). After the fixation, the sections were hydrated in TBS. To detect fibronectin in the kidney and the liver, anti-fibronectin antibody (catalog ab2413, Abcam) was diluted 1:100 in TBS containing 1% BSA and applied overnight at 4°C in a humidity chamber. After incubation with primary antibodies, all the sections were washed in TBS containing 0.01% Triton X-100. Alexa Fluor 488-conjugated secondary antibodies (in 1:150 dilution) were applied for 1 h at room temperature. Then the sections were washed, and mounted with Prolong Gold Antifade Reagent. At least 7-9 fields of each section were captured. Representative images were photographed using Axio Imager A1 microscope (Carl Zeiss, Melville, NY). ImageJ software was used to count fluorescence intensity on the images. To verify specificity of all immunostainings, primary antibodies were omitted in negative controls.

# Suppl. Fig. 14

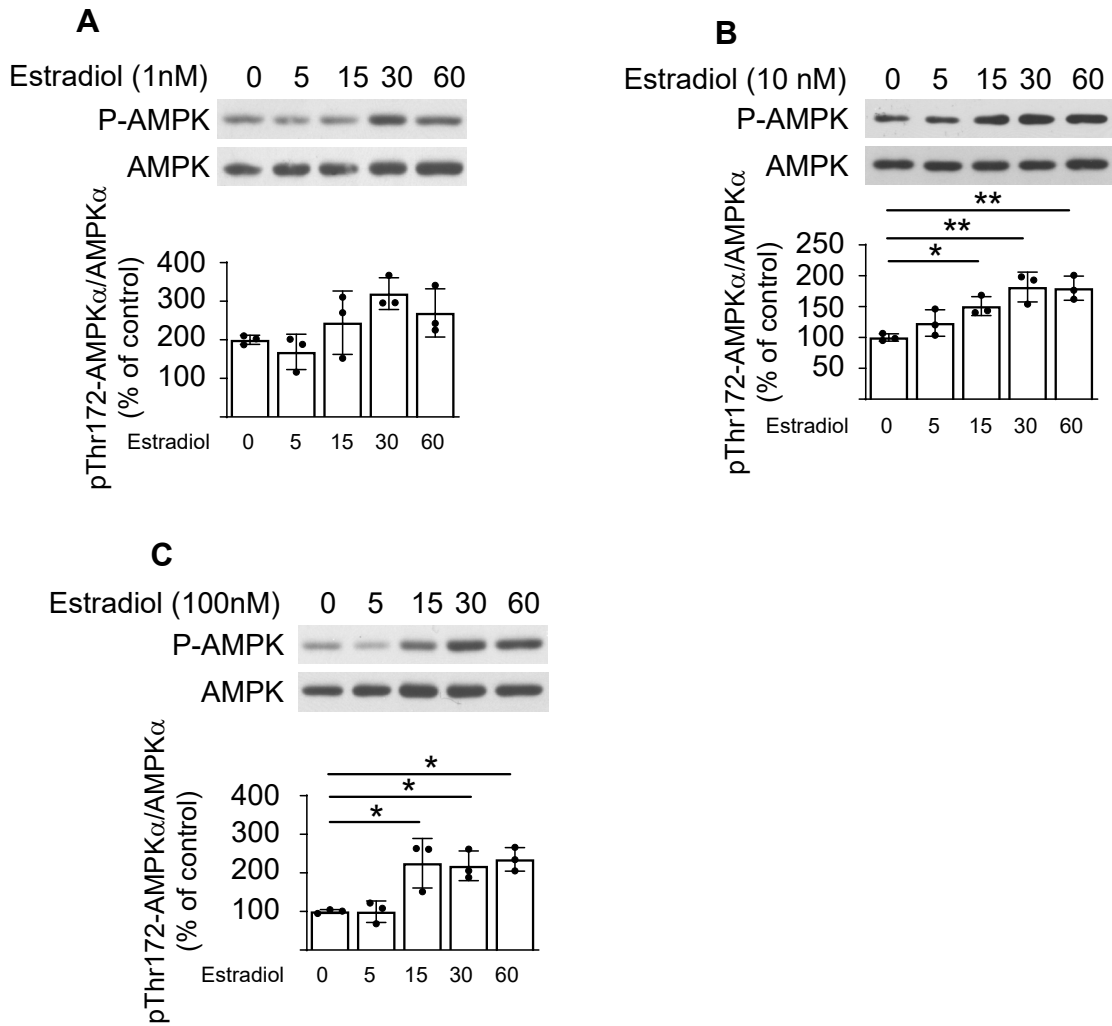

**Supple. Fig. 14. A-C.** MCT cells were incubated with 1 nM, 10 nM or 100 nM of estradiol for the indicated time points. \* $p < 0.05$ ,  $p < 0.01$  by One-way ANOVA

## Suppl. Fig. 15

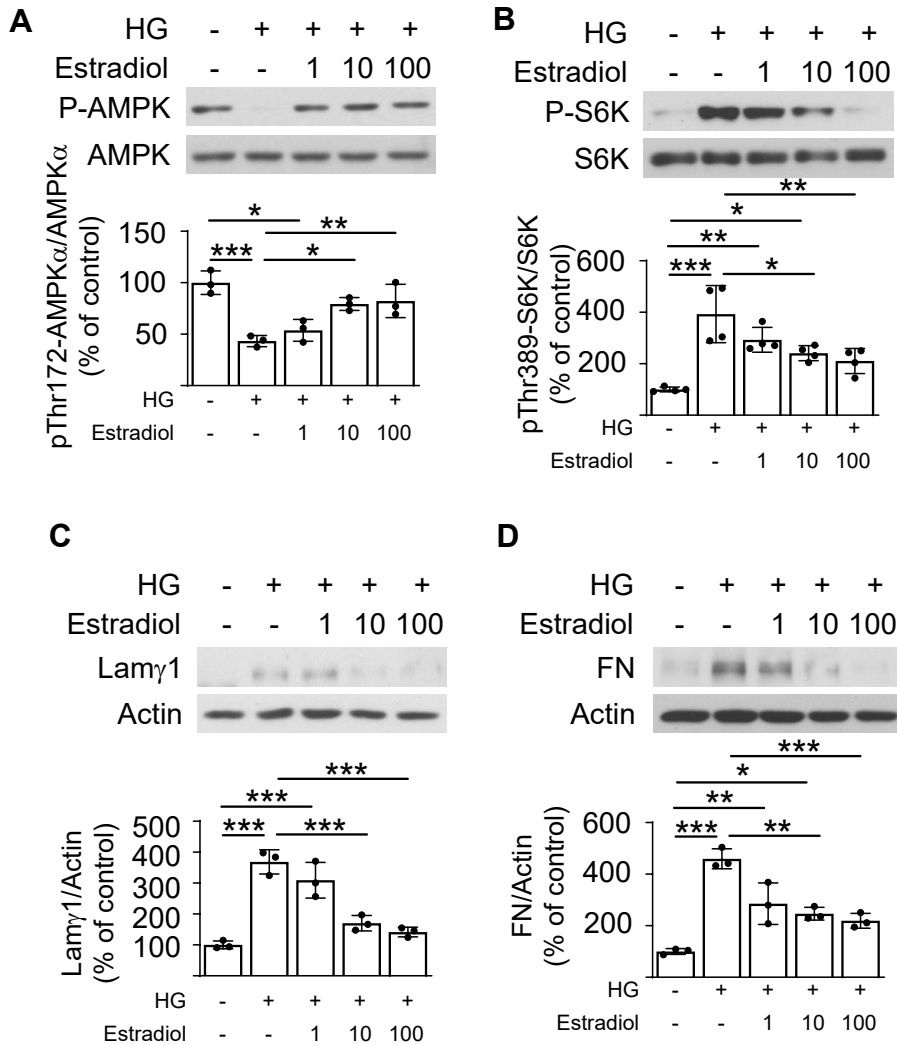

**Supple. Fig. 15. Estradiol ameliorate HG-induced mTORC1 activation and matrix protein accumulation in MCT cells. A, B.** HG decreased AMPK phosphorylation and increased p70S6K phosphorylation which were ameliorated by estradiol. **C, D.** HG-induced expression of laminin- $\gamma$ 1 and fibronectin was ameliorated by estradiol. The composite graphs shown mean  $\pm$  SD (3-4 experiments). \* $p$ <0.05, \*\* $p$ <0.01, \*\*\* $p$ <0.001 by One-way ANOVA.



# Suppl. Fig. 16

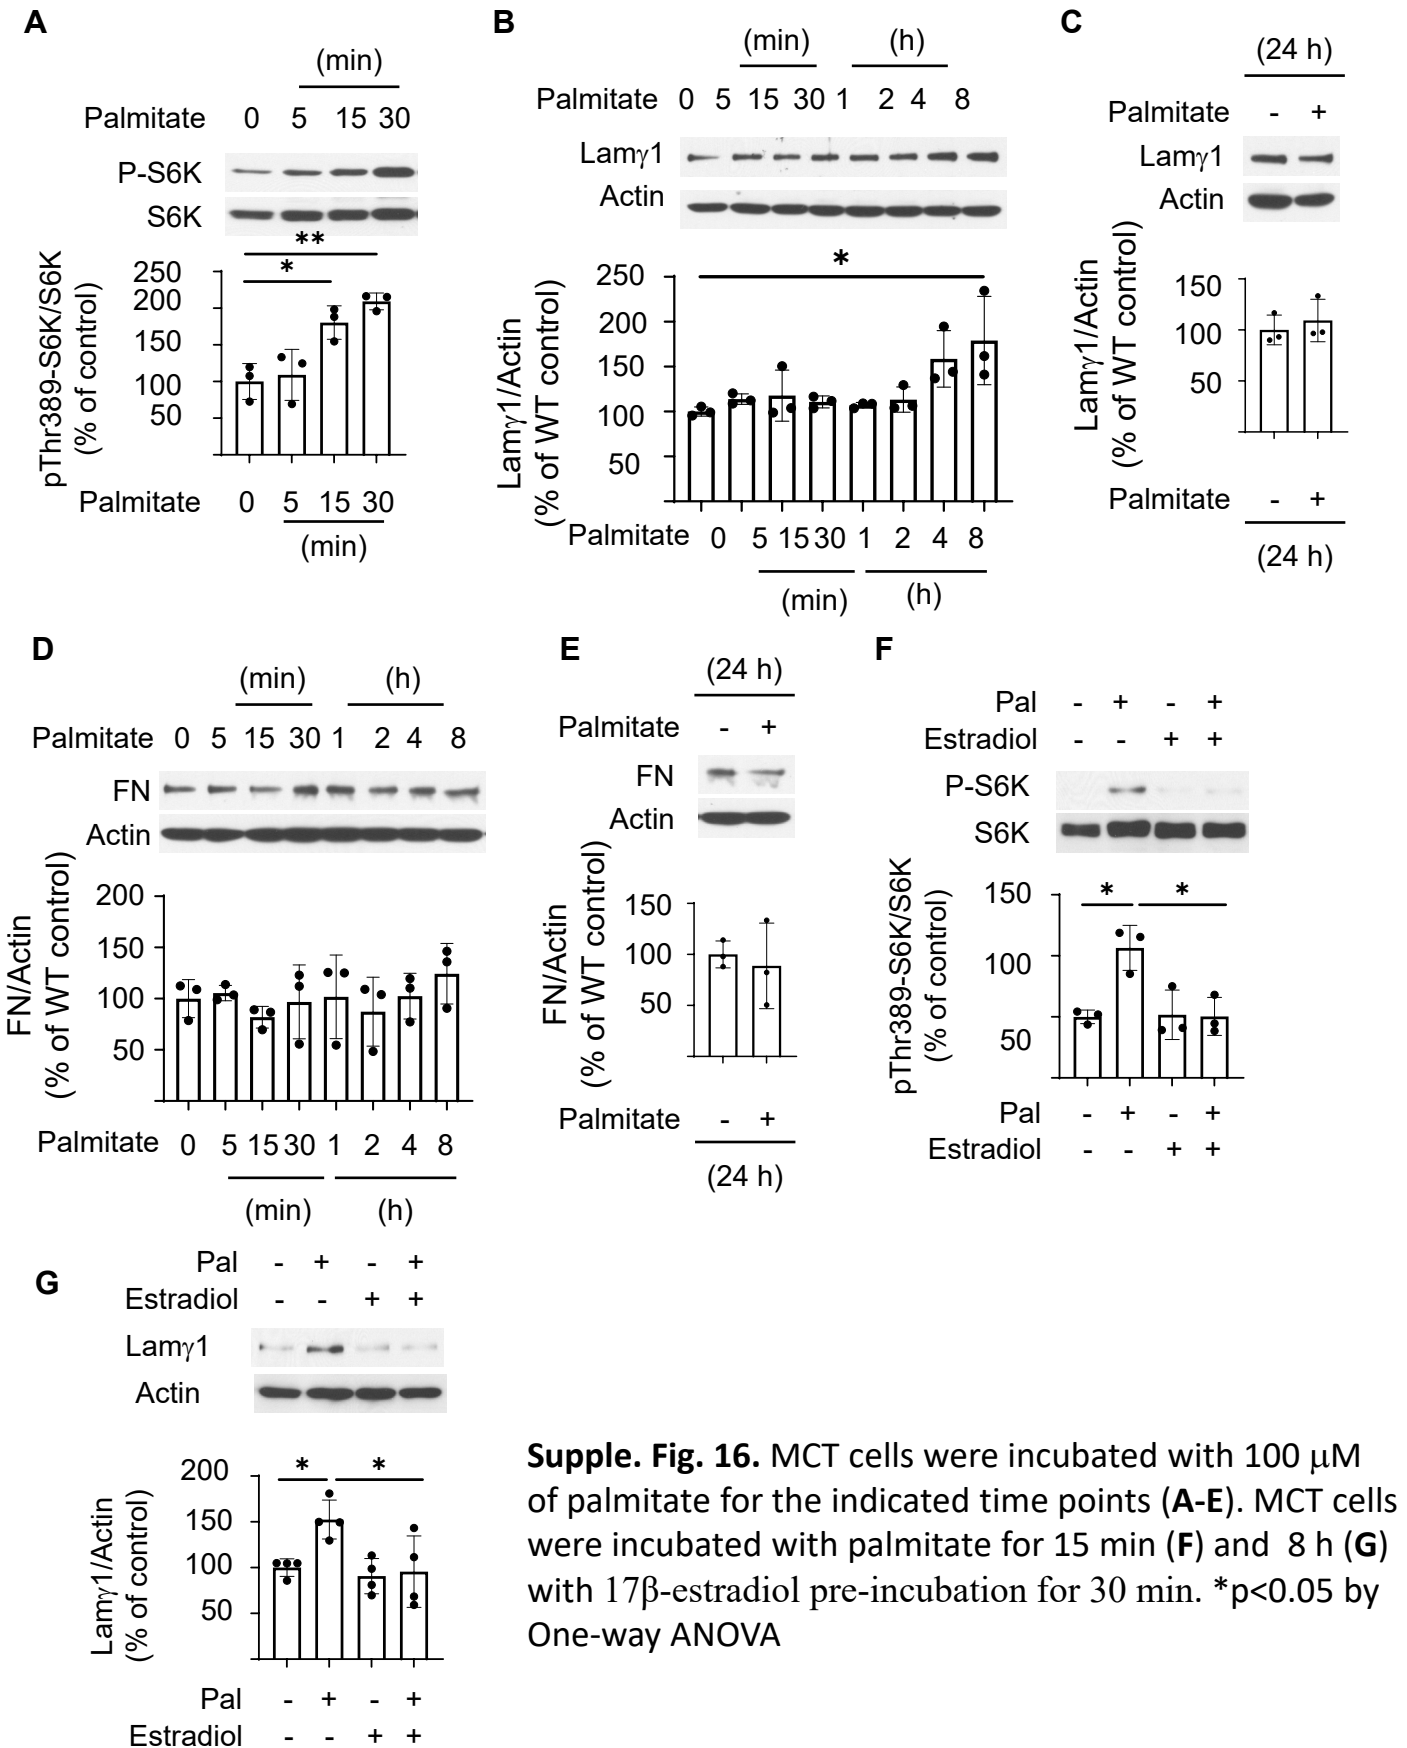

**Supple. Fig. 16.** MCT cells were incubated with 100  $\mu$ M of palmitate for the indicated time points (A-E). MCT cells were incubated with palmitate for 15 min (F) and 8 h (G) with 17 $\beta$ -estradiol pre-incubation for 30 min. \* $p$ <0.05 by One-way ANOVA

# Suppl. Fig. 17

Analysis: IPA\_F\_KO\_UP\_293\_from\_venh - 2022-12-23 03:43 PM

■ positive z-score ■ z-score = 0 ■ negative z-score ■ no activity pattern available

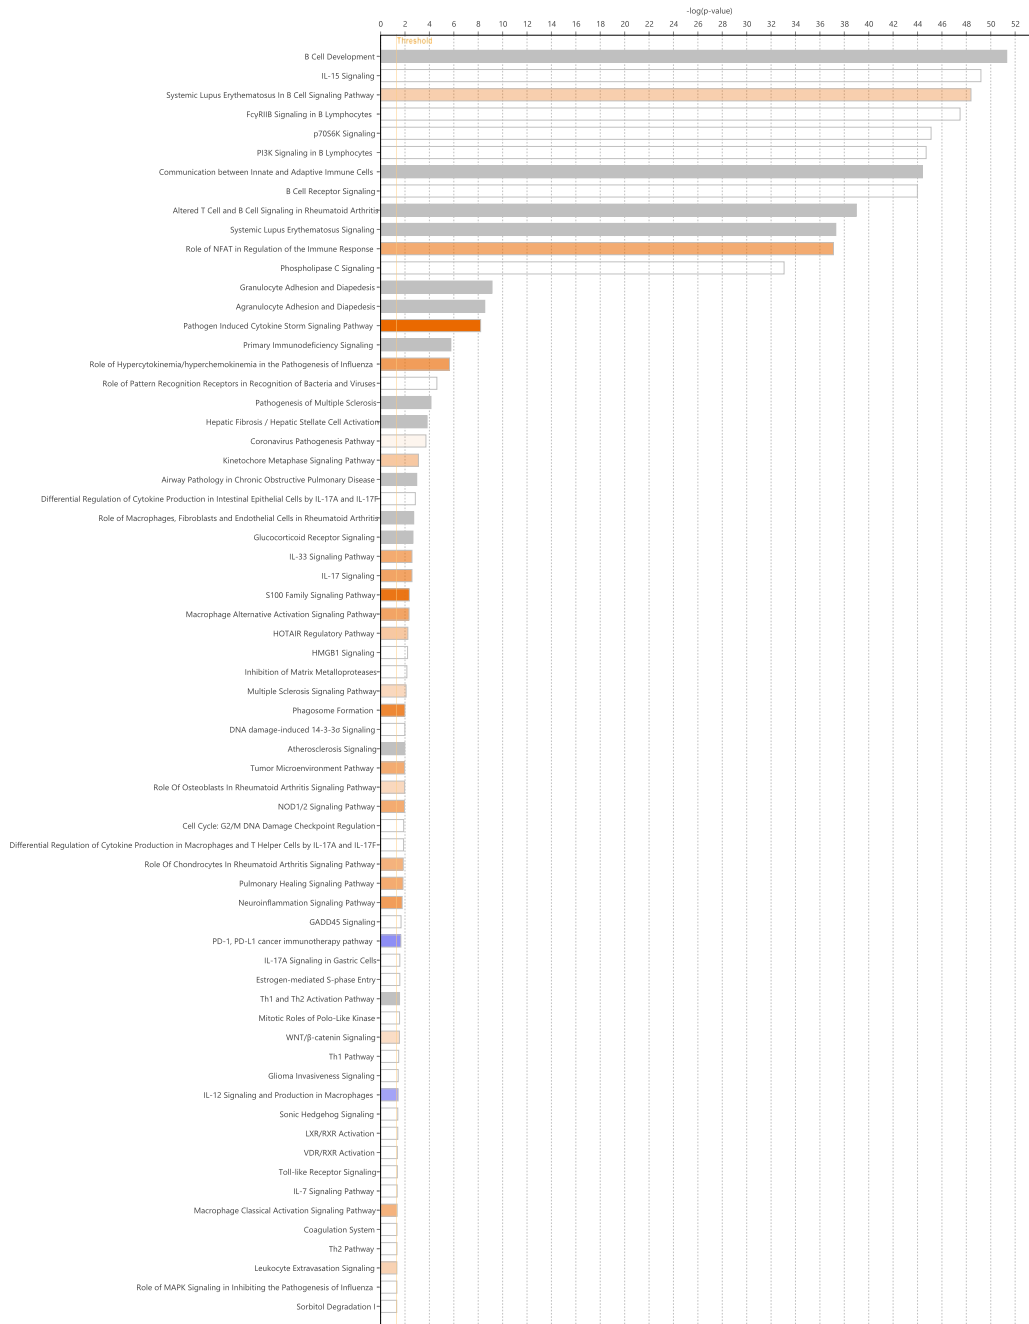

© 2000-2023 QIAGEN. All rights reserved.

**Supple. Fig. 17. Pathways which are increased in diabetic WT male and KAMPK $\gamma$ 2KO female mice by ingenuity pathway analysis. 293 genes were increased in the kidney.**

# Suppl. Fig. 18

Phenylalanine Degradation IV (Mammalian, via Side Chain) : IPA\_F\_KO\_Down\_7\_from\_venn : Expr Log Ratio

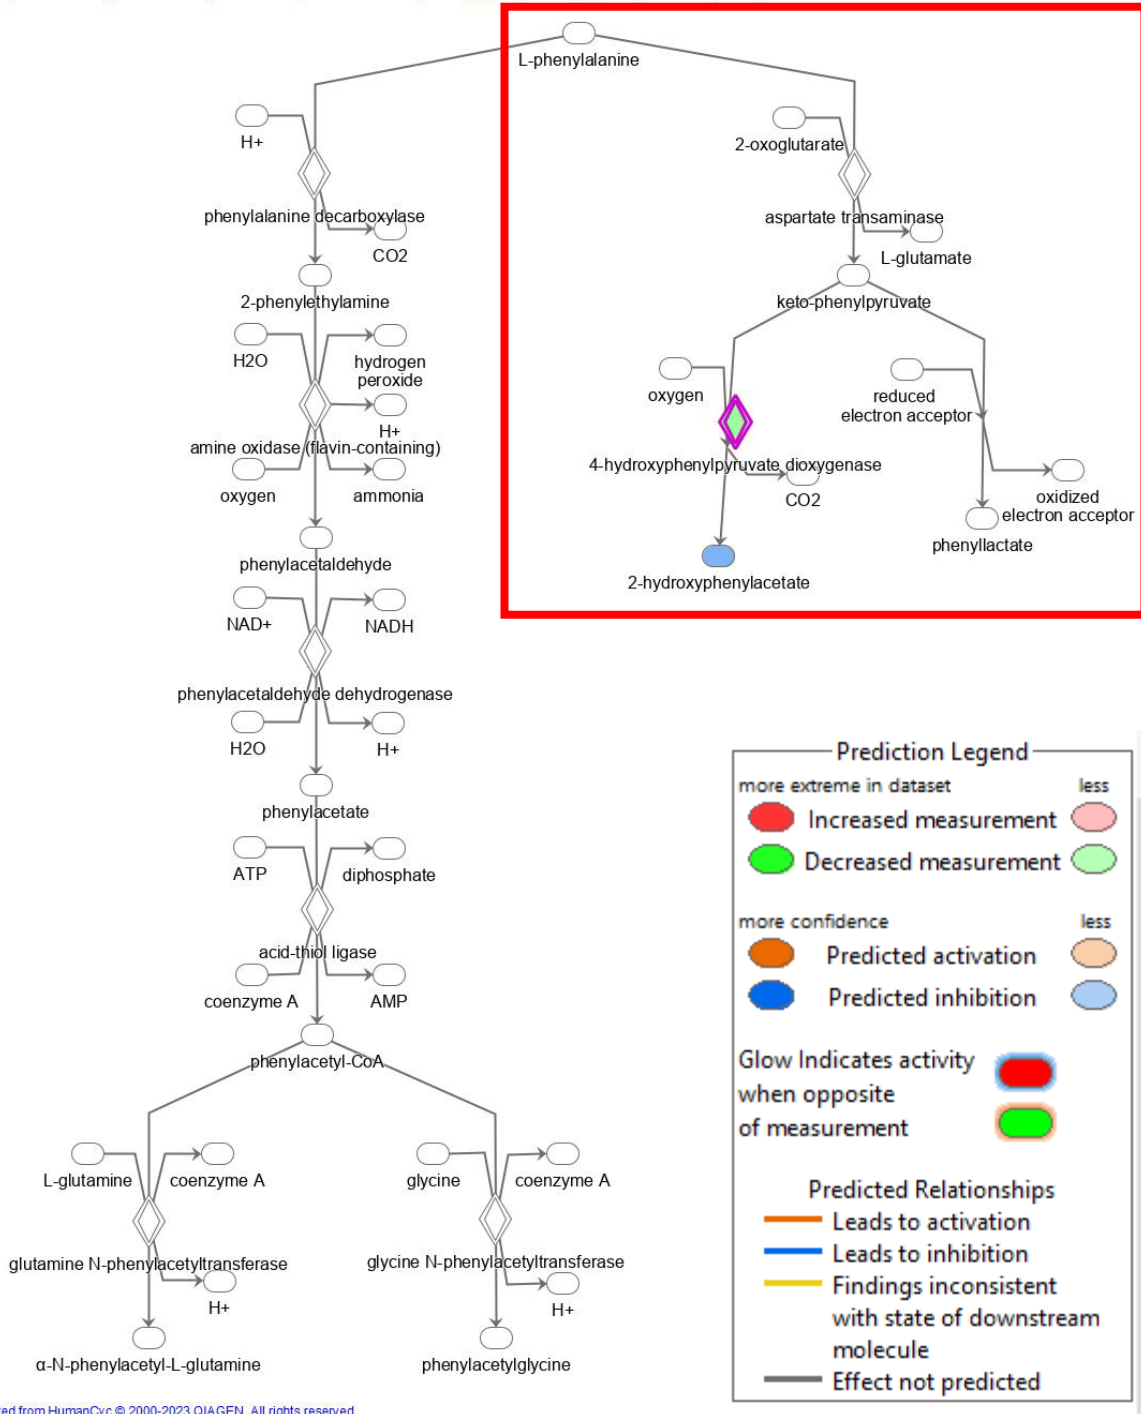

Adapted from HumanCyc. © 2000-2023 QIAGEN. All rights reserved.

**Supple. Fig. 18. 4-hydroxyphenylpyruvate dioxygenase (HFD) is decreased in diabetic WT male and KAMPK $\gamma$ 2KO female mice . HFD is involved in phenylalanine degradation pathway.**

## Suppl. Table 1. Plasma 17 $\beta$ -estradiol levels in male and female mice

| Male                          |      |          |                   |          | Female                        |      |          |                   |          |
|-------------------------------|------|----------|-------------------|----------|-------------------------------|------|----------|-------------------|----------|
| 17 $\beta$ -estradiol (pg/ml) | WT   |          | AMPK $\gamma$ 2KO |          | 17 $\beta$ -estradiol (pg/ml) | WT   |          | AMPK $\gamma$ 2KO |          |
|                               | Con  | Diabetes | Con               | Diabetes |                               | Con  | Diabetes | Con               | Diabetes |
| AVE                           | 46.3 | 137.5    | 119.6             | 38.1     | AVE                           | 37.2 | 73.1     | 59.7              | 60.7     |
| STDEV                         | 53.3 | 126.7    | 81.8              | 81.8     | STDEV                         | 41.4 | 41.9     | 98.7              | 79.5     |

### Suppl. Table 1. Plasma 17 $\beta$ -estradiol levels in male and female mice.

Mouse 17 $\beta$ -estradiol ELISA kit was used to measure plasma 17 $\beta$ -estradiol (catalog, ADI-900-174, Enzo Life Science, Farmingdale, NY)

**Suppl. Table 2. Visualization of DEGs from group comparisons**

|               |            |          |      |                                     |                                      |
|---------------|------------|----------|------|-------------------------------------|--------------------------------------|
| <b>Male</b>   | WT         | Control  | 5206 | 443 upregulated<br>80 downregulated |                                      |
|               |            |          | 5208 |                                     |                                      |
|               |            |          | 5209 |                                     |                                      |
|               |            | Diabetes | 591  |                                     |                                      |
|               |            |          | 5207 |                                     |                                      |
|               | 5215       |          |      |                                     |                                      |
|               | AMPK G2 KO | Control  | 5201 |                                     | 1054 upregulated<br>53 downregulated |
|               |            |          | 5203 |                                     |                                      |
|               |            | 5225     |      |                                     |                                      |
|               |            | Diabetes | 5202 |                                     |                                      |
| 5204          |            |          |      |                                     |                                      |
| 5205          |            |          |      |                                     |                                      |
| <b>Female</b> | WT         | Control  | 595  | 120 upregulated<br>4 downregulated  |                                      |
|               |            |          | 5210 |                                     |                                      |
|               |            |          | 5219 |                                     |                                      |
|               |            | Diabetes | 596  |                                     |                                      |
|               |            |          | 5211 |                                     |                                      |
|               | 5213       |          |      |                                     |                                      |
|               | AMPK G2 KO | Control  | 588  |                                     | 832 upregulated<br>45 downregulated  |
|               |            |          | 592  |                                     |                                      |
|               |            | 594      |      |                                     |                                      |
|               |            | Diabetes | 590  |                                     |                                      |
| 593           |            |          |      |                                     |                                      |
| 5212          |            |          |      |                                     |                                      |

# Suppl. Table 3

| (μM/mM)                          | Urine metabolites |                 |              |              |              |              |            |                     |
|----------------------------------|-------------------|-----------------|--------------|--------------|--------------|--------------|------------|---------------------|
|                                  | Male              |                 |              |              | Female       |              |            |                     |
|                                  | WT                |                 | KTAMPKg2KO   |              | WT           |              | KTAMPKg2KO |                     |
|                                  | Control           | Diabetes        | Control      | Diabetes     | Control      | Diabetes     | Control    | Diabetes            |
| Alanine/Creatinine               | 21.7 ±3.3         | 73.1 ±106.4     | 16.2 ±4.8    | 33.4 ±11.0   | 32.0 ±8.4    | 94.0 ±128.2  | 21.0 ±3.8  | 1017.7 ±1390.0      |
| Arginine/Creatinine              | 7.7 ±1.4          | 16.6 ±8.6       | 8.9 ±2.4     | 22.2 ±10.9** | 4.4 ±0.7     | 11.1 ±4.3    | 5.7 ±1.8   | 44.7 ±44.7*         |
| Asparagine/Creatinine            | 14.2 ±1.5         | 17.0 ±7.2       | 12.0 ±2.6    | 21.0 ±6.1*   | 14.2 ±1.8    | 32.8 ±39.7   | 14.4 ±1.9  | 319.3 ±406.0        |
| Aspartic acid/Creatinine         | 3.1 ±0.9          | 8.3 ±10.9       | 5.1 ±4.6     | 3.4 ±0.8     | 2.6 ±0.5     | 3.3 ±1.5     | 2.3 ±0.9   | 4.5 ±2.4            |
| Cysteine/Creatinine              | 15.2 ±1.7         | 44.8 ±29.3*     | 19.2 ±7.5    | 52.8 ±24.1*  | 11.7 ±6.7    | 32.5 ±25.9   | 10.4 ±2.6  | 91.3 ±77.2          |
| Glutamic acid/Creatinine         | 14.5 ±4.3         | 61.2 ±60.9*     | 18.5 ±9.9    | 33.6 ±10.0   | 14.1 ±2.3    | 29.9 ±12.9   | 14.4 ±4.2  | 91.6 ±60.5**        |
| Glutamine/Creatinine             | 37.4 ±5.1         | 292.5 ±372.5    | 39.2 ±5.9    | 304.8 ±255.2 | 43.8 ±15.6   | 208.0 ±257.4 | 40.4 ±4.5  | 2318.0<br>±2171.7** |
| Glycine/Creatinine               | 95.3 ±9.0         | 220.6 ±100.5*** | 104.3 ±26.2  | 153.4 ±35.3  | 71.5 ±7.9    | 141.0 ±72.1  | 60.9 ±4.7  | 652.4 ±676.5*       |
| Histidine/Creatinine             | 6.1 ±0.6          | 58.0 ±89.1      | 5.3 ±0.6     | 33.6 ±21.7   | 5.5 ±1.2     | 44.9 ±75.8   | 5.7 ±1.1   | 485.4 ±504.1*       |
| Isoleucine/Creatinine            | 3.4 ±0.4          | 23.0 ±15.07***  | 3.4 ±1.4     | 17.4 ±7.6*   | 4.6 ±0.8     | 27.8 ±32.5   | 5.0 ±1.8   | 221.9 ±244.6*       |
| Leucine/Creatinine               | 12.0 ±0.2         | 50.8 ±30.9**    | 7.2 ±1.7     | 42.5 ±17.9** | 8.9 ±2.2     | 57.0 ±73.0   | 7.3 ±2.5   | 458.0 ±556.2*       |
| Lysine/Creatinine                | 8.7 ±1.6          | 15.4 ±7.6       | 9.4 ±2.2     | 17.3 ±5.9*   | 11.2 ±2.4    | 24.0 ±10.6   | 12.4 ±2.7  | 145.9 ±171.1        |
| Methionine/Creatinine            | 2.5 ±0.4          | 14.8 ±14.7*     | 2.3 ±0.8     | 10.0 ±5.4    | 3.8 ±1.3     | 15.4 ±17.7   | 3.4 ±1.0   | 133.5 ±174.4        |
| Phenylalanine/Creatinine         | 5.4 ±0.5          | 15.5 ±5.2****   | 4.3 ±0.9     | 12.9 ±3.6*** | 5.4 ±1.0     | 17.7 ±13.2   | 5.0 ±1.4   | 107.1 ±122.6*       |
| Proline/Creatinine               | 3.9 ±0.7          | 57.0 ±112.1     | 4.2 ±2.9     | 11.0 ±4.3    | 5.2 ±1.8     | 76.5 ±146.5  | 5.2 ±1.8   | 189.3 ±379.9        |
| Serine/Creatinine                | 9.6 ±1.1          | 32.1 ±22.3*     | 8.4 ±2.1     | 35.4 ±16.4** | 10.4 ±3.2    | 62.0 ±93.2   | 10.3 ±2.3  | 634.1 ±789.2        |
| Threonine/Creatinine             | 18.3 ±3.0         | 155.6 ±203.1    | 16.4 ±2.4    | 123.6 ±88.8  | 22.3 ±4.6    | 181.7 ±331.1 | 24.3 ±6.6  | 1593.3 ±1815.1*     |
| Tryptophan/Creatinine            | 1.7 ±0.1          | 6.6 ±8.2        | 1.5 ±0.2     | 4.3 ±1.6     | 2.1 ±0.4     | 8.1 ±10.7    | 2.0 ±0.3   | 65.4 ±72.9          |
| Tyrosine/Creatinine              | 5.6 ±1.0          | 48.5 ±54.7      | 5.2 ±1.8     | 46.3 ±30.8   | 10.3 ±5.5    | 70.2 ±109.4  | 8.9 ±2.8   | 803.0 ±851.2*       |
| Valine/Creatinine                | 7.6 ±1.2          | 35.5 ±22.3***   | 6.2 ±1.6     | 28.6 ±10.9*  | 9.8 ±2.3     | 43.0 ±46.4   | 11.6 ±3.7  | 441.5 ±530.0*       |
| Adenine/Creatinine               | 0.80 ±0.22        | 0.69 ±0.43      | 1.72 ±2.1    | 0.39 ±0.15   | 0.41 ±0.15   | 0.42 ±0.24   | 0.46 ±0.21 | 0.57 ±0.30          |
| Betaine/Creatinine               | 31.0 ±7.2         | 145.4 ±105.1**  | 30.1 ±8.7    | 59.6 ±13.1   | 60.6 ±28.0   | 141.9 ±68.1  | 32.1 ±11.8 | 145.2 ±84.2**       |
| GABA/Creatinine                  | 26.1 ±4.0         | 65.4 ±26.6***   | 38.5 ±5.7    | 52.0 ±11.7   | 22.8 ±12.9   | 20.7 ±6.0    | 14.0 ±2.9  | 28.6 ±8.3**         |
| L-α-aminobutyric acid/Creatinine | 0.3 ±0.1          | 4.7 ±4.0**      | 0.3 ±0.1     | 2.8 ±2.2     | 0.7 ±0.2     | 2.5 ±2.8     | 0.8 ±0.2   | 61.1 ±62.7*         |
| Ornithine/Creatinine             | 2.1 ±0.7          | 9.9 ±4.4***     | 3.4 ±1.0     | 8.7 ±3.7*    | 2.8 ±1.8     | 6.3 ±2.6     | 2.5 ±0.6   | 32.4 ±30.5*         |
| Pipecolate/Creatinine            | 44.0 ±6.2         | 45.0 ±5.1       | 43.3 ±1.7    | 51.4 ±7.1    | 52.4 ±6.7    | 52.7 ±7.6    | 48.8 ±6.9  | 59.8 ±14.8          |
| Serotonin/Creatinine             | 0.9 ±0.1          | 0.7 ±0.1*       | 0.9 ±0.1     | 0.6 ±0.1**** | 0.9 ±0.2     | 0.6 ±0.1     | 0.8 ±0.1   | 0.5 ±0.4            |
| (nM/mM)                          | Control           | Diabetes        | Control      | Diabetes     | Control      | Diabetes     | Control    | Diabetes            |
| 3-hydroxykynurenine/Creatinine   | 150.1 ±35.3       | 577.9 ±406.8**  | 56.8 ±38.2   | 303.0 ±83.0  | 49.9 ±18.5   | 103.7 ±42.6  | 38.0 ±35.0 | 220.9 ±120.8***     |
| DL-homocysteine/Creatinine       | 27.4 ±13.2        | 12.2 ±7.0       | 33.4 ±33.8   | 12.0 ±5.7    | 38.4 ±27.6   | 7.1 ±2.9*    | 45.8 ±18.6 | 16.2 ±15.7*         |
| Kynurenine/Creatinine            | 28.5 ±28.1        | 70.5 ±113.8     | 7.0 ±1.2     | 46.7 ±41.7   | 33.8 ±11.4   | 82.2 ±131.2  | 46.6 ±12.4 | 1470.2 ±1711.9*     |
| Nicotinic acid/Creatinine        | 35.6 ±56.5        | 887.8 ±1663.0   | 436.2 ±907.1 | 188.8 ±251.5 | 131.0 ±197.6 | 555.6 ±727.8 | 16.1 ±26.9 | 324.6 ±464.1        |
| Sulpiride/Creatinine             | 6.2 ±1.3          | 12.2 ±7.0       | 7.0 ±1.2     | 12.0 ±5.7    | 5.1 ±2.9     | 7.1 ±2.9     | 5.5 ±2.4   | 10.7 ±6.4           |
| Glycyl-histidine/Creatinine      | 21.0 ±16.2        | 56.7 ±41.8      | 24.0 ±15.2   | 42.6 ±31.1   | 29.5 ±12.9   | 44.9 ±14.6   | 28.8 ±16.1 | 95.1 ±58.0          |

\*p<0.05, \*\*p<0.01, \*\*\*p<0.001, \*\*\*\*p<0.0001 vs non-diabetic control
